# Supplementary material for: Comparison of tumor and two types of paratumoral tissues highlighted epigenetic regulation of transcription during field cancerization in non-small cell lung cancer
Source: PubMed Central journal article supplement (PMC8939144; doi:10.1186/s12920-022-01192-1), 2022-03-21

# A KEGG\_ECM\_RECEPTOR\_INTERACTION

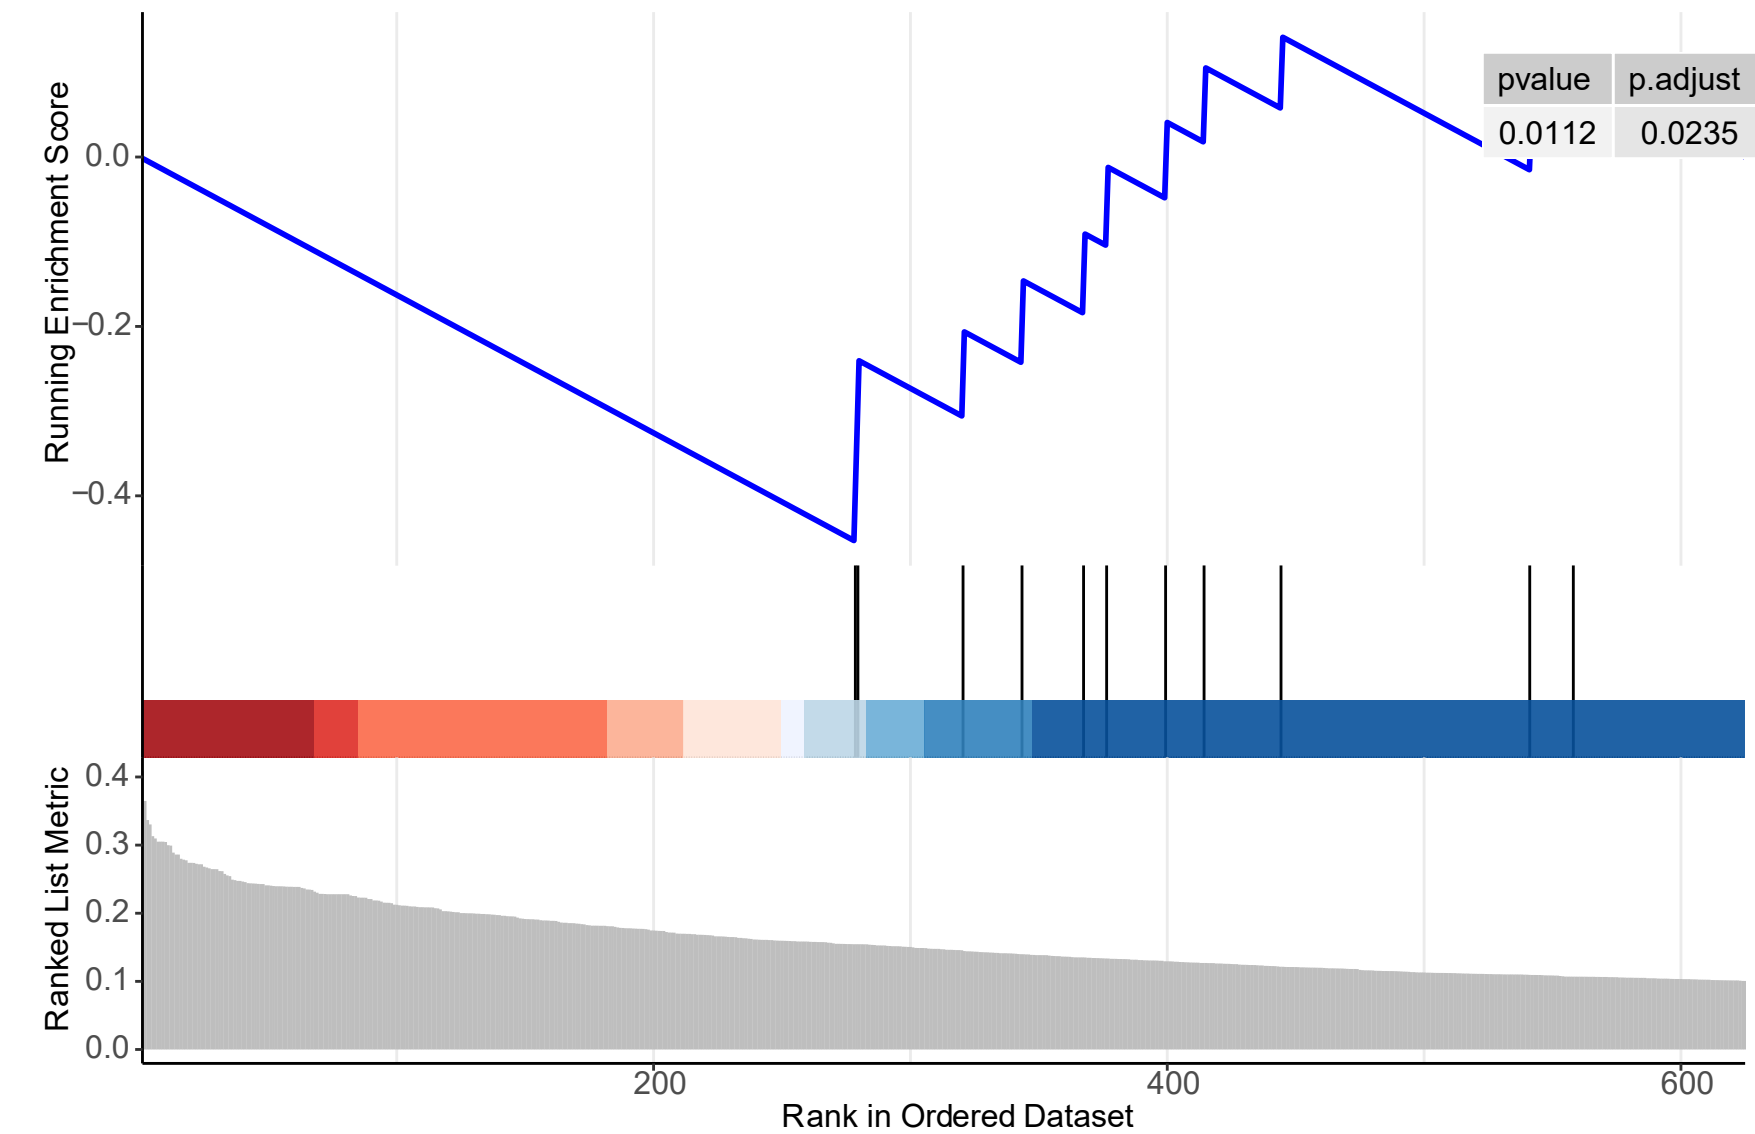

# B KEGG\_FOCAL\_ADHESION

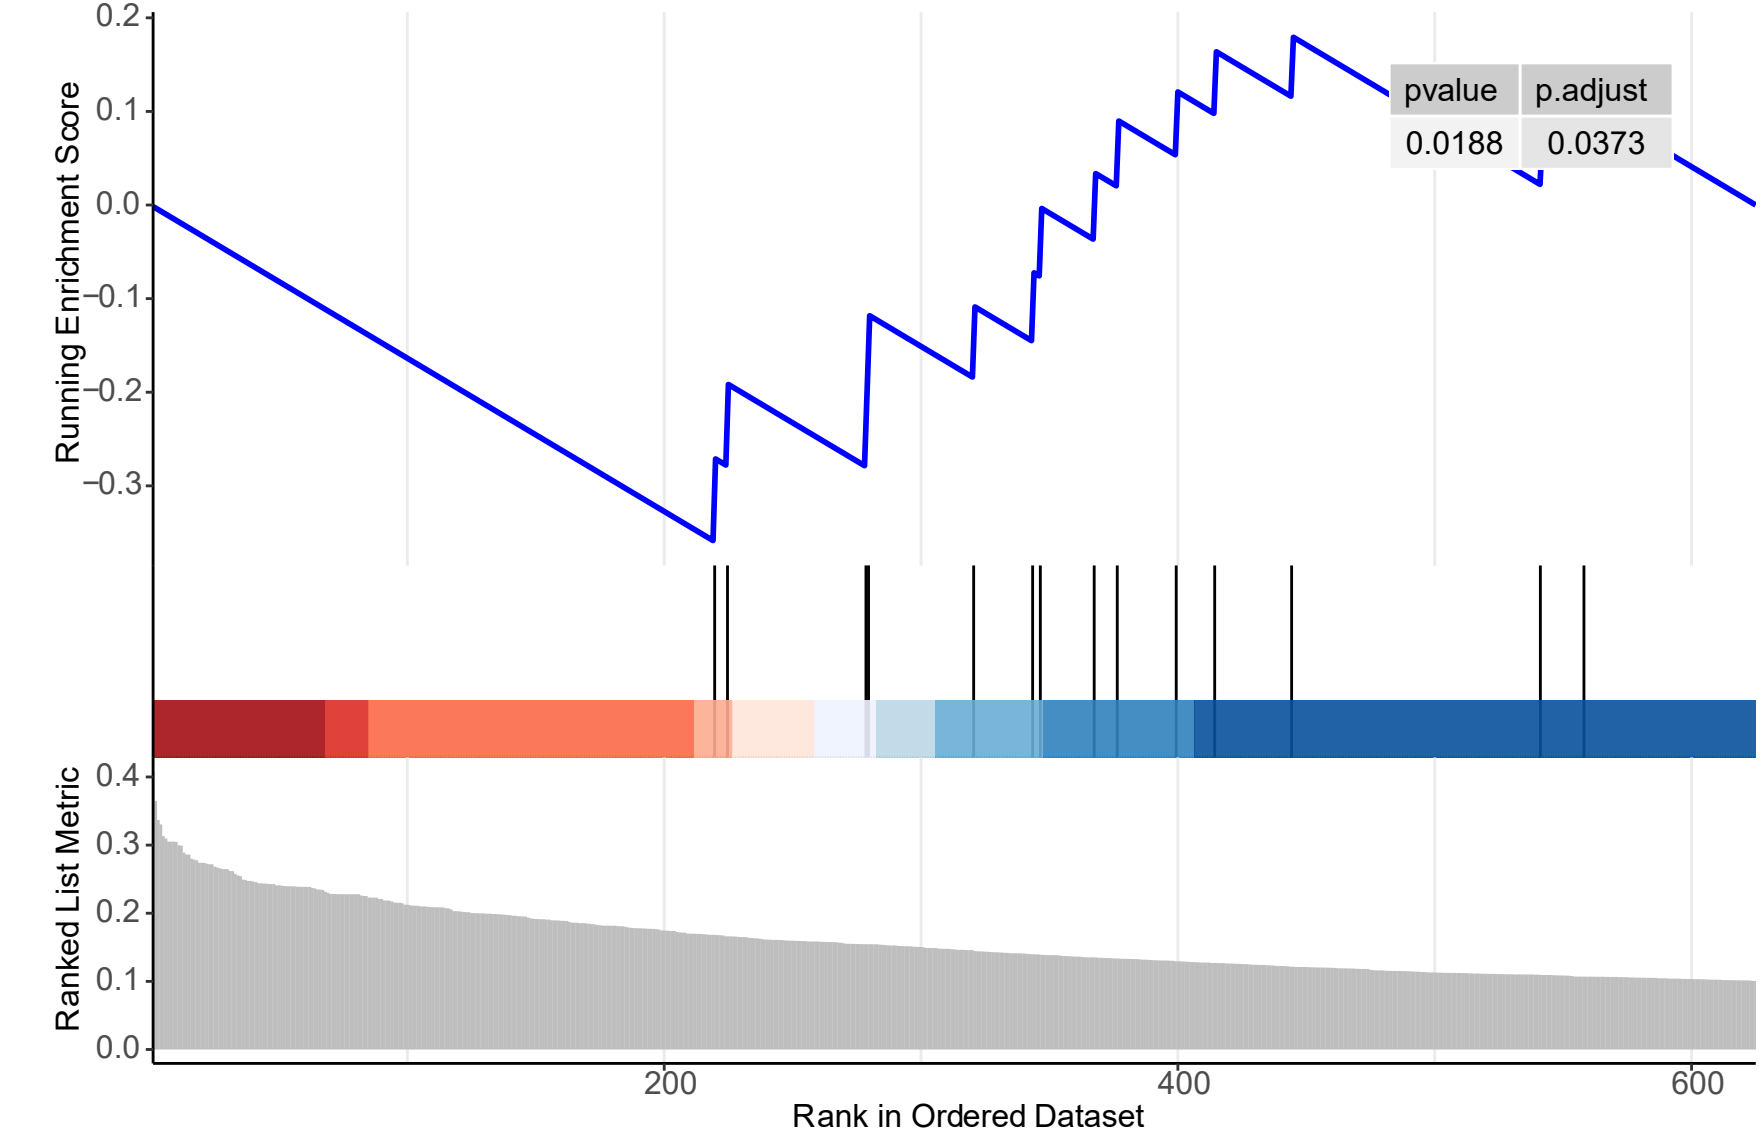

Supplement: 12920_2022_1192_MOESM1_ESM.pdf [file 12920_2022_1192_MOESM1_ESM.pdf]
